# Supplementary material for: A global fuel characteristic model and dataset for wildfire prediction
Source: Copernicus journal article supplement (doi:10.5194/egusphere-2023-1984), 2023-09-13
Supplement: Supplementary file 1 [file egusphere-2023-1984-supplement.pdf]

# Supplementary Material: A global fuel characteristic model and dataset for wildfire prediction

Joe R. McNorton<sup>1</sup>, Francesca Di Giuseppe<sup>2</sup>

<sup>1</sup>Research Department, European Centre for Medium-Range Weather Forecasts, RG45AJ, UK

5 <sup>2</sup>Forecast Department, European Centre for Medium-Range Weather Forecasts, RG45AJ, UK

Correspondence to: Joe R. McNorton (joe.mcnorton@ecmwf.int)

**Supplementary Table 1. ECLand vegetation types and parameter values used to derive categorised fuel load. Values estimated where references are not given. †Relates LAI to wood mass (see equation 4, Harper et al., 2018).**

| Vegetation Type            | Live Percentage (%) | Dead Foliage Percentage (%) | Leaf Mass per Unit Area | Allometric Coefficient † | Reference                                                                              |
|----------------------------|---------------------|-----------------------------|-------------------------|--------------------------|----------------------------------------------------------------------------------------|
| Crops                      | 85                  | 100                         | 0.1370                  | 0.005                    | -                                                                                      |
| Short grass                | 85                  | 100                         | 0.0495                  | 0.005                    | Fan <i>et al.</i> (2007), Peichl <i>et al.</i> (2011), Perez <i>et al.</i> (2000)      |
| Evergreen needleleaf trees | 65                  | 45                          | 0.2263                  | 0.65                     | Pan <i>et al.</i> (2011)                                                               |
| Deciduous needleleaf trees | 55                  | 60                          | 0.1006                  | 0.80                     | Pan <i>et al.</i> (2011)                                                               |
| Deciduous broadleaf trees  | 60                  | 90                          | 0.0823                  | 0.78                     | Michaelian <i>et al.</i> (2010), Pan <i>et al.</i> (2011), Peichl <i>et al.</i> (2011) |
| Evergreen broadleaf trees  | 85                  | 10                          | 0.1039                  | 0.845                    | Pan <i>et al.</i> (2011)                                                               |

|                    |    |     |        |       |                                                                             |
|--------------------|----|-----|--------|-------|-----------------------------------------------------------------------------|
| Mixed Crops        | 60 | 100 | 0.1370 | 0.005 | Fan <i>et al.</i> (2007), Guo <i>et al.</i> (2005), Li <i>et al.</i> (2020) |
| Desert             | 50 | 50  | 0.1370 | 0.005 | -                                                                           |
| Tundra             | 75 | 50  | 0.0495 | 0.005 | -                                                                           |
| Irrigated crops    | 85 | 100 | 0.1370 | 0.005 | -                                                                           |
| Semidesert         | 65 | 50  | 0.1370 | 0.005 | -                                                                           |
| Bogs and marshes   | 65 | 50  | 0.1370 | 0.005 | -                                                                           |
| Evergreen shrubs   | 70 | 50  | 0.1515 | 0.13  | Anderson <i>et al.</i> (2015), Baeza <i>et al.</i> (2006)                   |
| Deciduous shrubs   | 65 | 90  | 0.0709 | 0.13  | Li <i>et al.</i> (2020), Taylor <i>et al.</i> (2021)                        |
| Broadleaf Savannah | 80 | 90  | 0.1370 | 0.13  | -                                                                           |
| Interrupted forest | 60 | 90  | 0.1039 | 0.78  | -                                                                           |

**Supplementary Table 2. Vegetation-specific coefficients used to derive live fuel moisture content used in equation 4.**

| Vegetation Type            | $LFMC_{max}$ | $A$    | $\alpha$ | $\beta$ | $\gamma$ |
|----------------------------|--------------|--------|----------|---------|----------|
| Crops                      | 110.8        | 1500.9 | 27.2     | 0.00    | 0.0      |
| Short Grass                | 197.4        | 119.7  | 0.2      | 0.23    | 0.5      |
| Evergreen needleleaf trees | 132.6        | 65.3   | 1.9      | 0.00    | 1.2      |
| Deciduous broadleaf trees  | 131.5        | 78.7   | 0.0      | 0.00    | 3.8      |
| Mixed Crops                | 165.8        | 148.2  | 4.3      | 0.00    | 0.6      |
| Deciduous shrubs           | 158.8        | 131.0  | 3.5      | 0.00    | 1.7      |
| Broadleaf Savannah         | 242.3        | 237.9  | 1.8      | 0.03    | 0.0      |

**Supplementary Table 3. Allocation of vegetation-specific fuel into the 4 classes defined by the National Fire Danger Rating System (Deeming et al., 1978).**

| Vegetation Type            | 1-h Fuel (% of dead foliage) | 10-h Fuel (% of dead foliage) | 100-h Fuel (% of dead wood) | 1000-h Fuel (% of dead wood) |
|----------------------------|------------------------------|-------------------------------|-----------------------------|------------------------------|
| Crops                      | 50                           | 50                            | 100                         | 0                            |
| Short grass                | 100                          | 0                             | 100                         | 0                            |
| Evergreen needleleaf trees | 53                           | 47                            | 30                          | 70                           |
| Deciduous needleleaf trees | 53                           | 47                            | 30                          | 70                           |
| Deciduous broadleaf trees  | 53                           | 47                            | 30                          | 70                           |
| Evergreen broadleaf trees  | 53                           | 47                            | 30                          | 70                           |
| Mixed Crops                | 50                           | 50                            | 100                         | 0                            |
| Desert                     | 65                           | 35                            | 100                         | 0                            |
| Tundra                     | 65                           | 35                            | 100                         | 0                            |
| Irrigated crops            | 50                           | 50                            | 100                         | 0                            |
| Semidesert                 | 65                           | 35                            | 100                         | 0                            |
| Bogs and marshes           | 65                           | 35                            | 100                         | 0                            |
| Evergreen shrubs           | 65                           | 35                            | 100                         | 0                            |
| Deciduous shrubs           | 50                           | 50                            | 100                         | 0                            |
| Broadleaf Savannah         | 50                           | 50                            | 50                          | 50                           |
| Interrupted forest         | 50                           | 50                            | 50                          | 50                           |

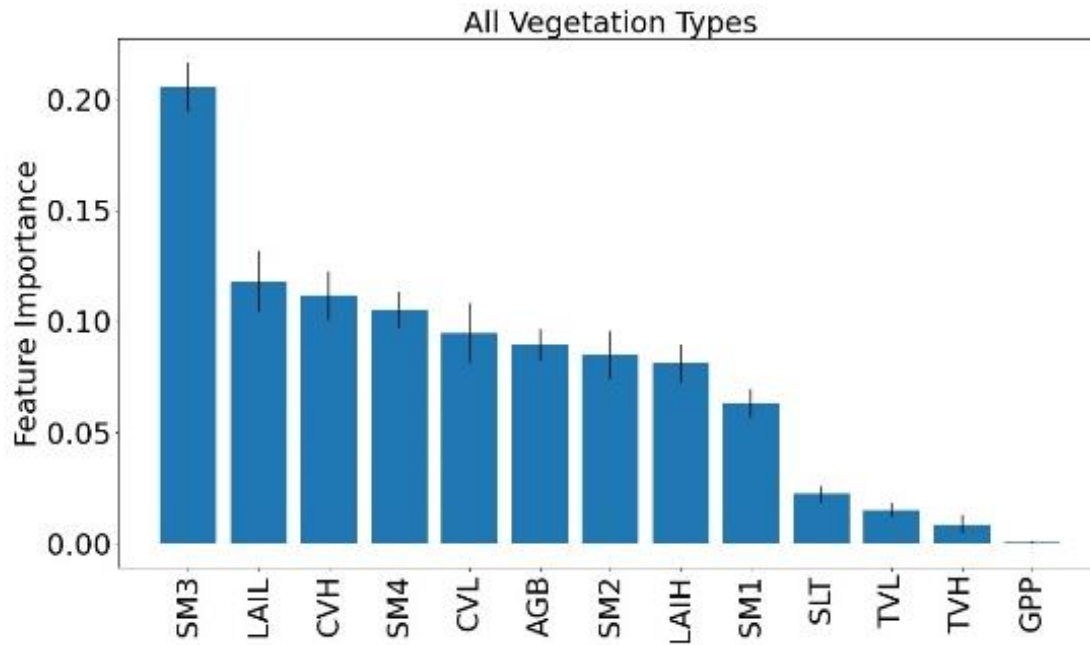

Supplementary Figure 1. Feature importance output from random forest training of model variables against live fuel moisture content observations.

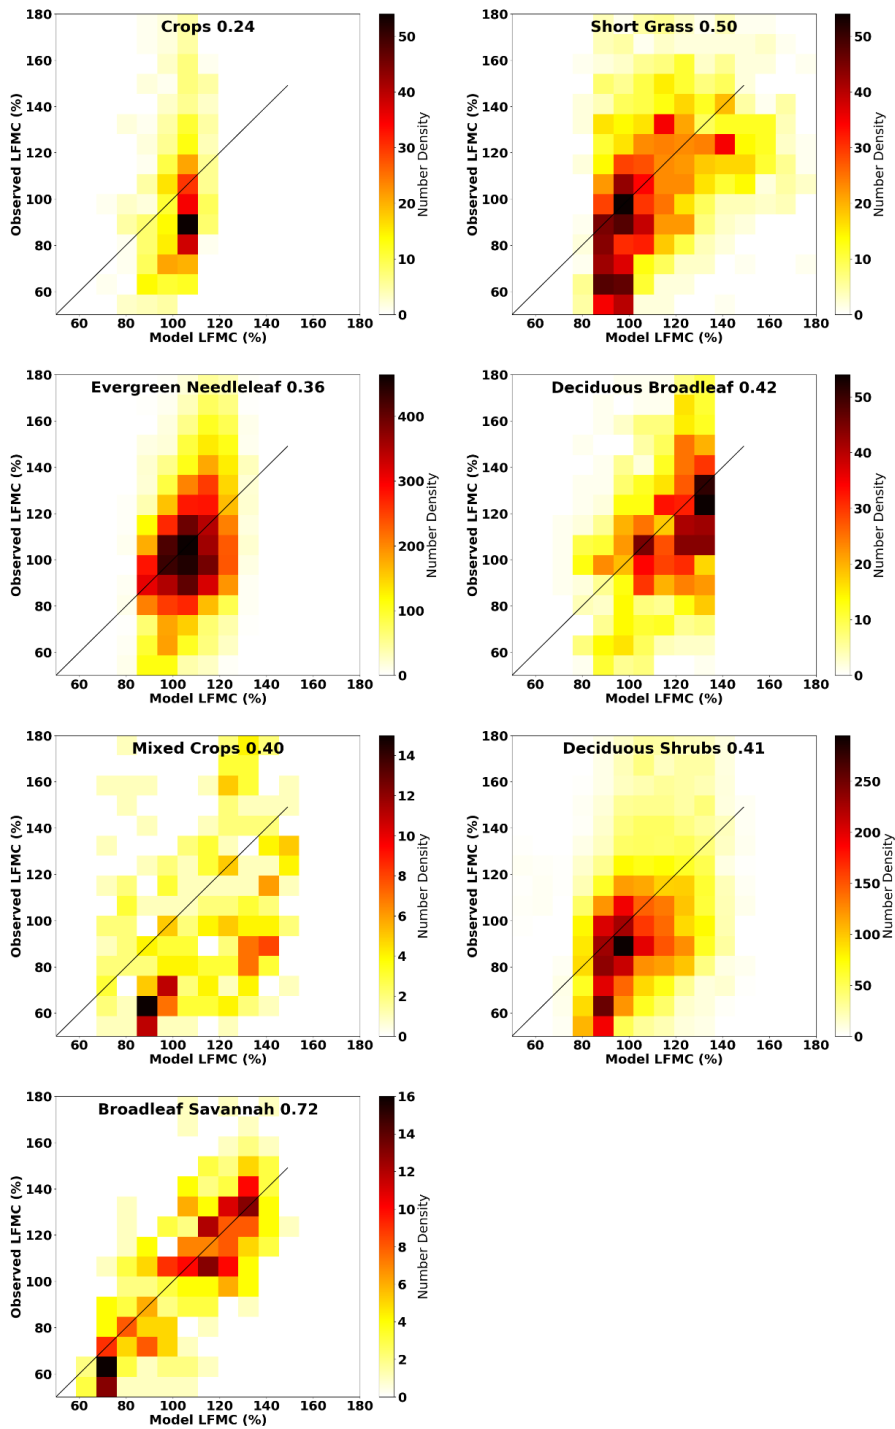

20 **Supplementary Figure 2. A density heat map showing the correlation of all modelled and sampled live fuel moisture content for 7 vegetation types between 2010 and 2019. The R-value is given for each type.**
